# Supplementary material for: Patient satisfaction with peri-operative anesthesia care and associated factors at two National Referral Hospitals: a cross sectional study in Eritrea
Source: Springer Nature journal article supplement (doi:10.1186/s12913-019-4499-x), 2019-09-18
Supplement: MOESM1 [file 17185366]

**Additional file 1**

| <b>Demographic and clinical Characteristics of the participants</b> |             |                  |                   |
|---------------------------------------------------------------------|-------------|------------------|-------------------|
| <b>Variables</b>                                                    |             | <b>Frequency</b> | <b>Percentage</b> |
| <b>Gender</b>                                                       | Male        | 259              | 55.1              |
|                                                                     | Female      | 211              | 44.9              |
| <b>Residence</b>                                                    | Urban       | 274              | 58.3              |
|                                                                     | Rural       | 196              | 41.7              |
| <b>Occupation</b>                                                   | Employed    | 235              | 50                |
|                                                                     | Unemployed  | 235              | 50                |
| <b>Hospital Setting</b>                                             | Halibet     | 173              | 36.8              |
|                                                                     | Orotta      | 297              | 63.2              |
| <b>Health coverage</b>                                              | Paying      | 358              | 76.2              |
|                                                                     | Free        | 112              | 23.8              |
| <b>Type of Anesthesia</b>                                           | General     | 267              | 56.8              |
|                                                                     | Regional    | 203              | 43.2              |
| <b>Type of Surgery</b>                                              | General     | 261              | 55.5              |
|                                                                     | Orthopedic  | 99               | 21.1              |
|                                                                     | Gyn/Obs     | 89               | 18.9              |
|                                                                     | ENT         | 7                | 1.5               |
|                                                                     | Burn        | 14               | 3.0               |
| <b>Case</b>                                                         | Emergency   | 109              | 23.2              |
|                                                                     | Elective    | 361              | 76.8              |
| <b>Age</b>                                                          | <b>Mean</b> | <b>SD</b>        |                   |
|                                                                     | 45.87       | 18.53            |                   |
